# Supplementary material for: An exquisite branch–leaf shaped metal sulfoselenide composite endowing an ultrastable sodium-storage lifespan over 10 000 cycles
Source: Royal Society of Chemistry journal article supplement (doi:10.1039/d2ta05202d), 2022-01-01
Supplement: d2ta05202d1.pdf [file d2ta05202d1.pdf]

## Electronic Supplementary Information

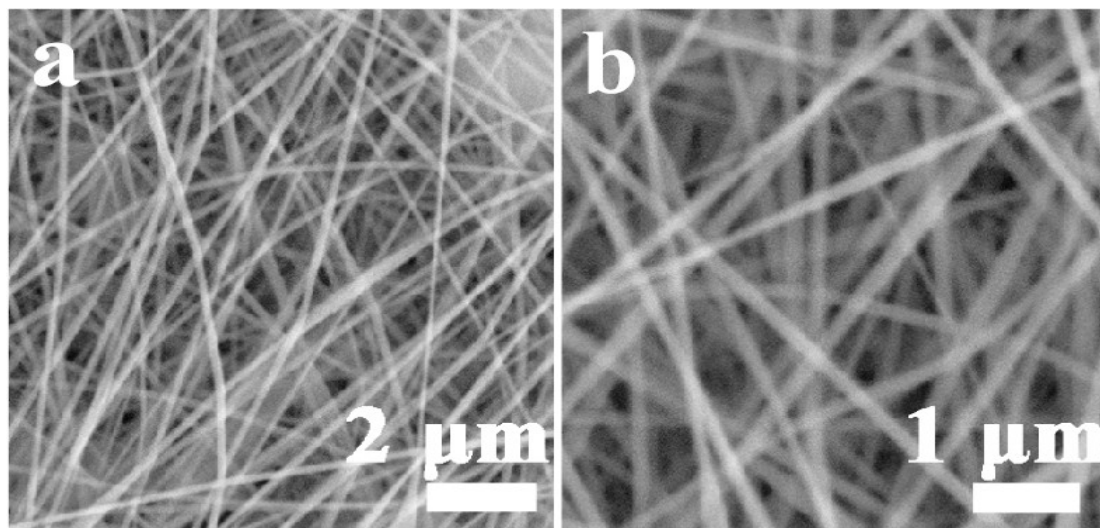

Fig. S1 (a, b) SEM images of PAN nanofibers.

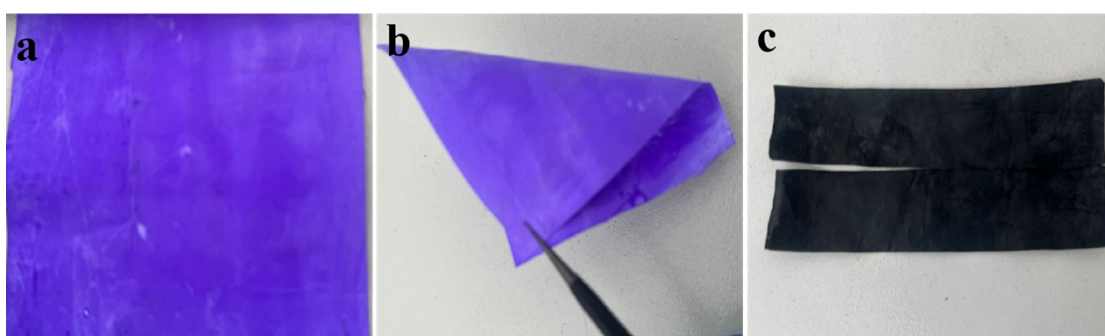

Fig. S2 Digital photos of the flexible film: (a, b) PAN@ZIF-67 nanofibers, (c) CNF@Co@C composites.

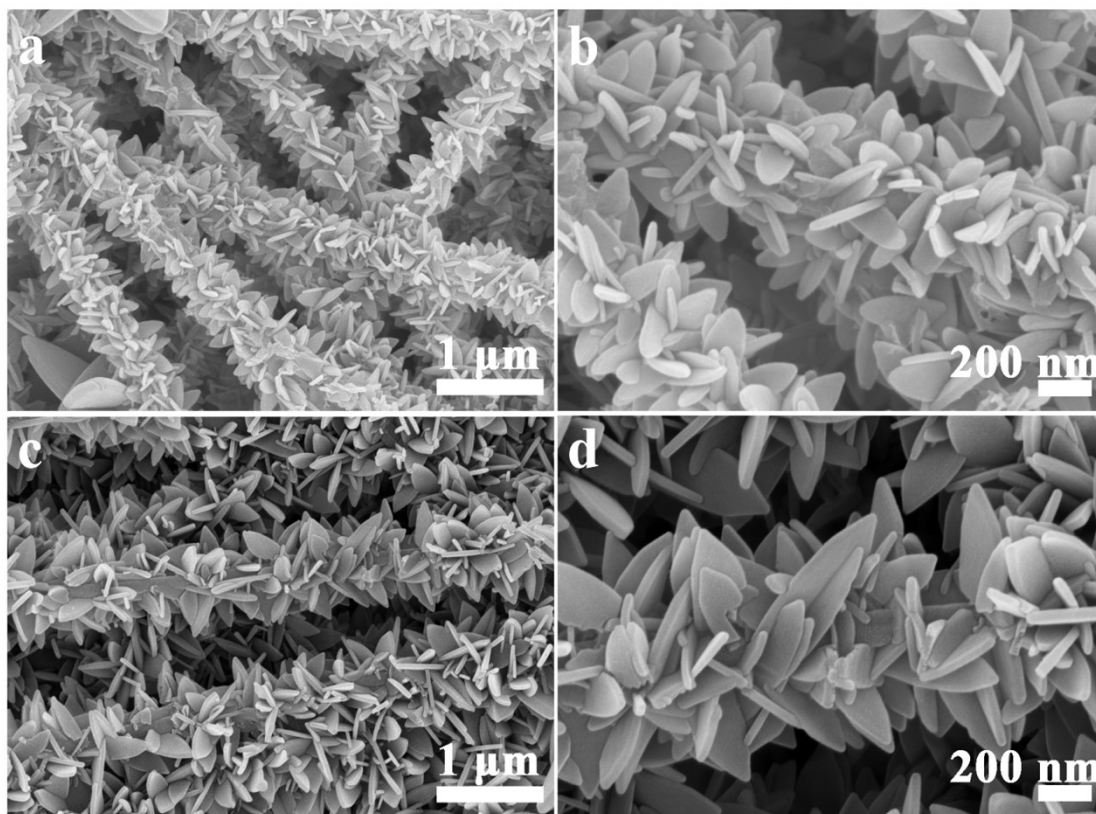

Fig. S3 SEM images of the PAN@ZIF-67/ZIF-8 nanofibers (a, b) and PAN@ZIF-8 nanofibers (c, d).

Note: PAN@ZIF-67/ZIF-8 nanofibers were synthesized as well through same procedure of the PAN@ZIF-67 nanofibers but using 1 mmol  $\text{Co}(\text{NO}_3)_2 \cdot 6\text{H}_2\text{O}$  and 1 mmol  $\text{Zn}(\text{NO}_3)_2 \cdot 6\text{H}_2\text{O}$  dissolved in 20 deionized water, meanwhile, 1.3 g 2-MIM was dissolved into 20 ml deionized water as well. In addition, PAN@ZIF-67/ZIF-8 nanofibers were synthesized as well through same procedure of the PAN@ZIF-67 nanofibers but using 2 mmol  $\text{Zn}(\text{NO}_3)_2 \cdot 6\text{H}_2\text{O}$  dissolved in 20 deionized water, meanwhile, 1.3 g 2-MIM was dissolved into 20 ml deionized water as well.

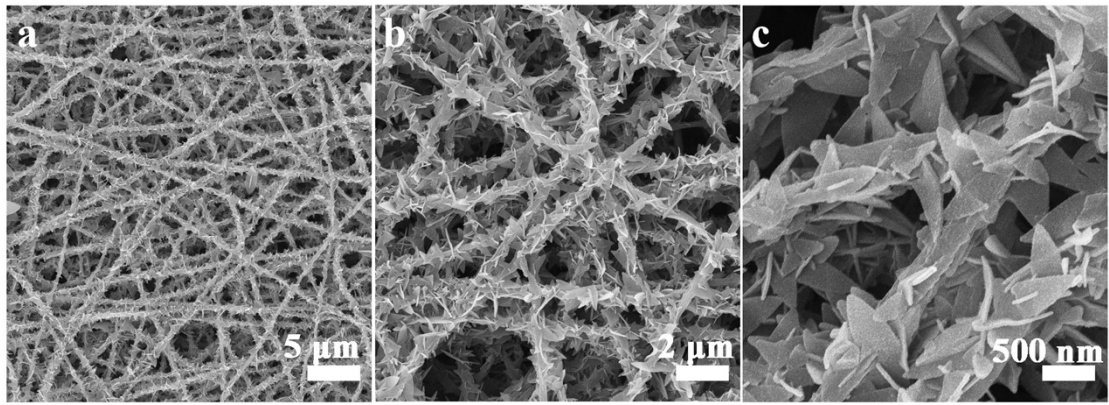

Fig. S4 (a-c) SEM images of the CNF@Co@C composites.

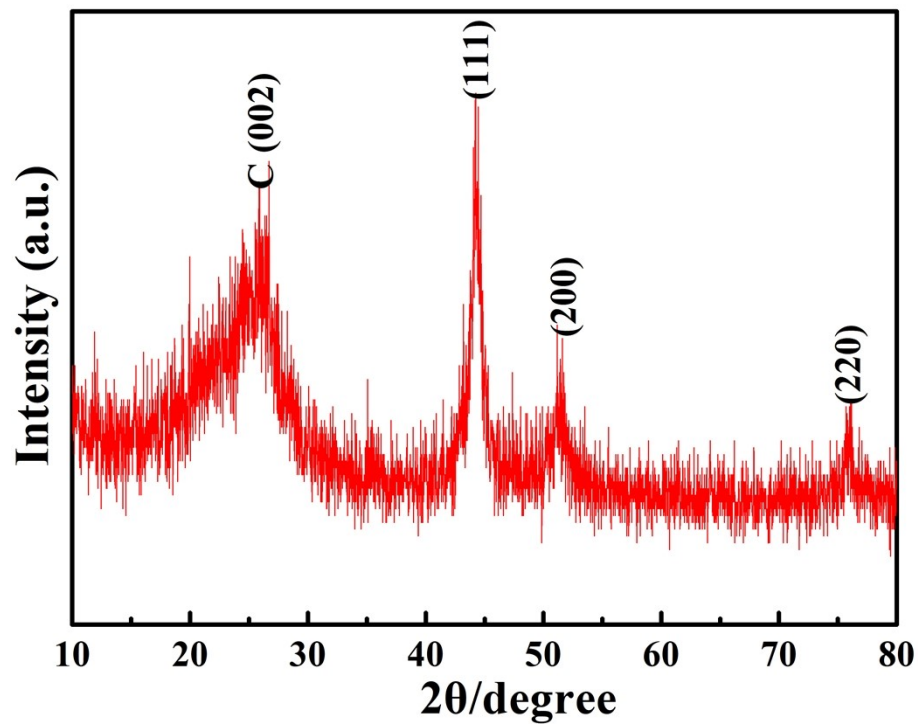

Fig. S5 XRD pattern of the CNF@Co@C composites.

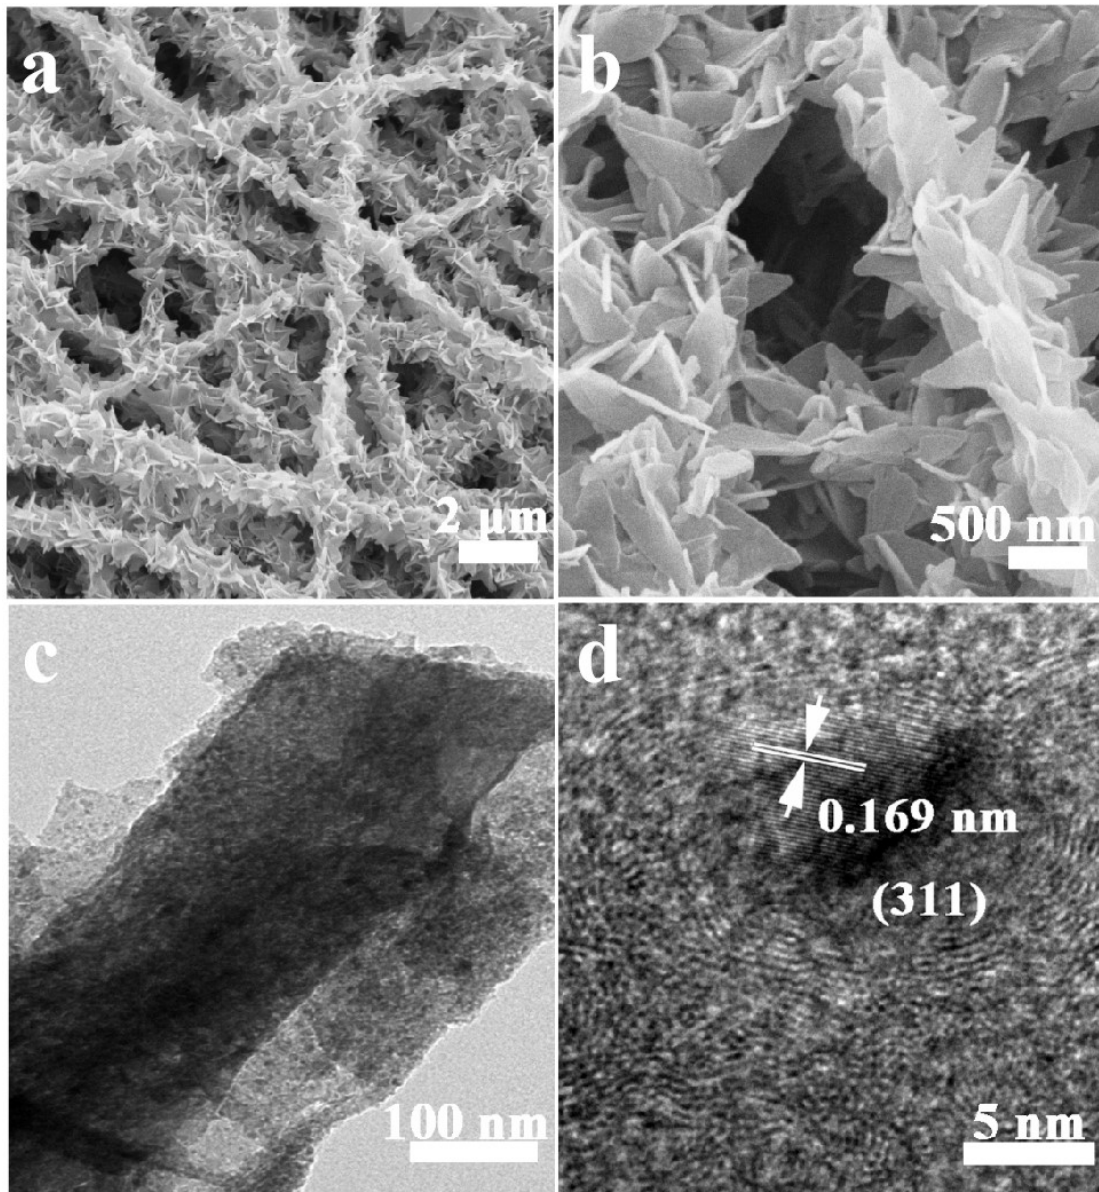

Fig. S6 (a, b) SEM images of the CNF@CoS<sub>2</sub>@C composites, TEM (c) and HRTEM (d) images of the CNF@CoS<sub>2</sub>@C composites.

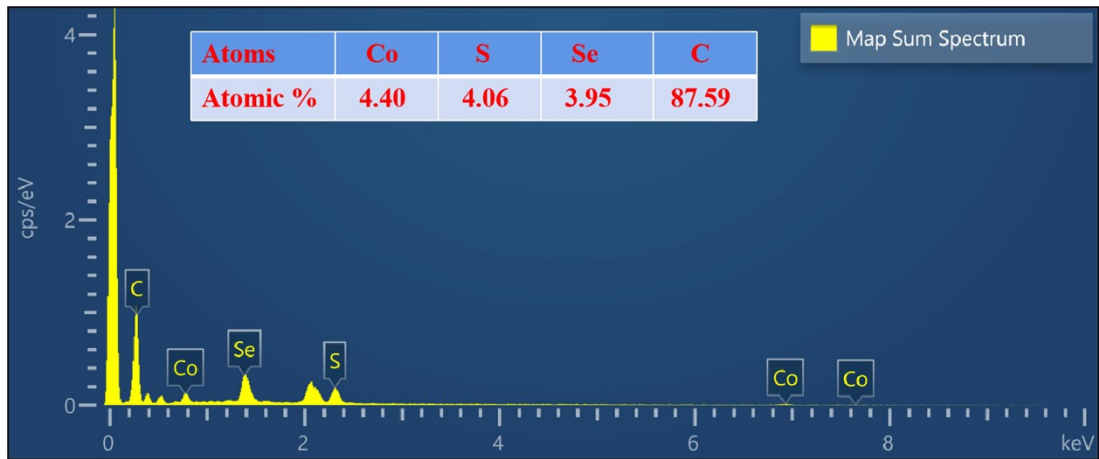

Fig. S7 EDX spectrum of the CNF@CoSSe@C composites.

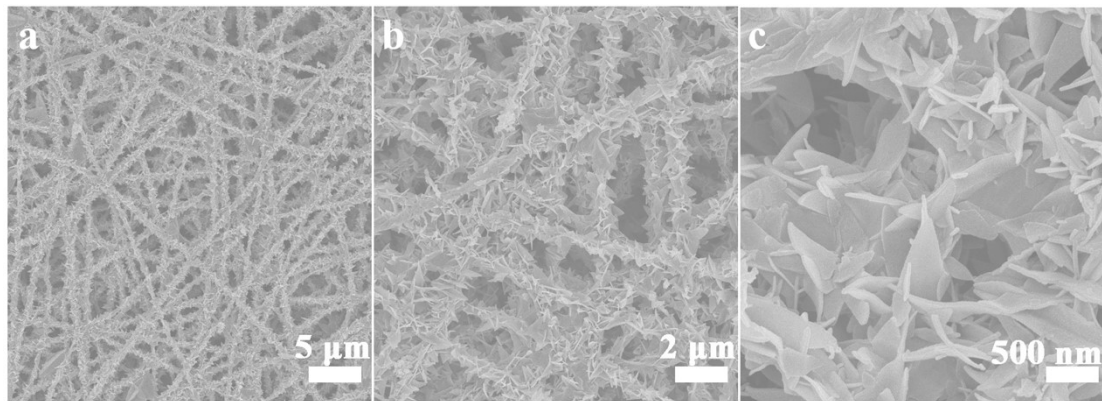

Fig. S8 SEM image of the CNF@CoSe<sub>2</sub>@C composites.

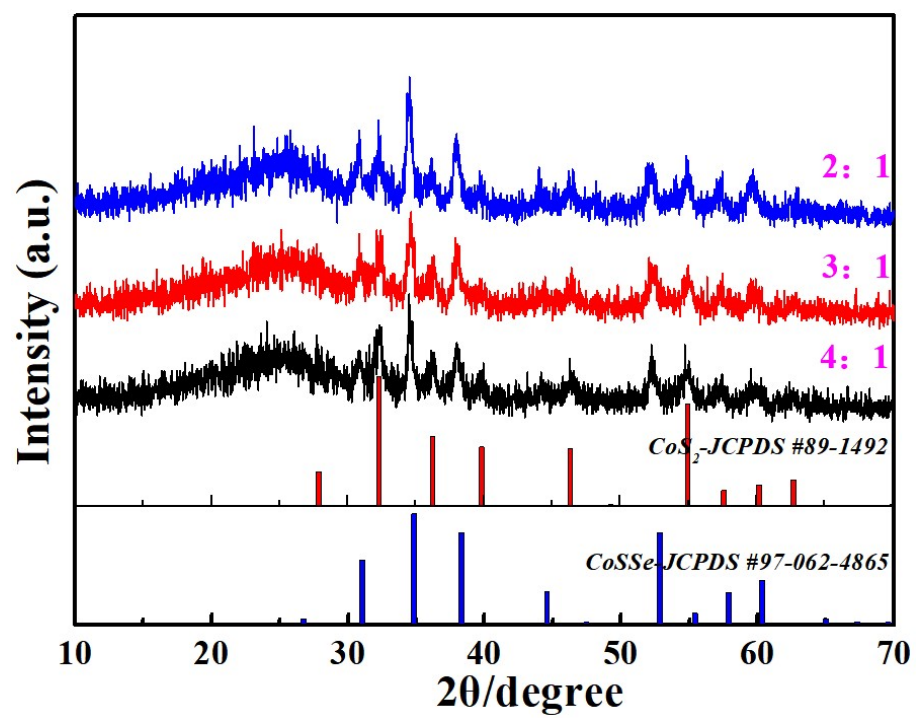

Fig. S9 XRD patterns of the CoSSe@C composites at different mass ratio between CNF@CoS<sub>2</sub>@C and Se powder.

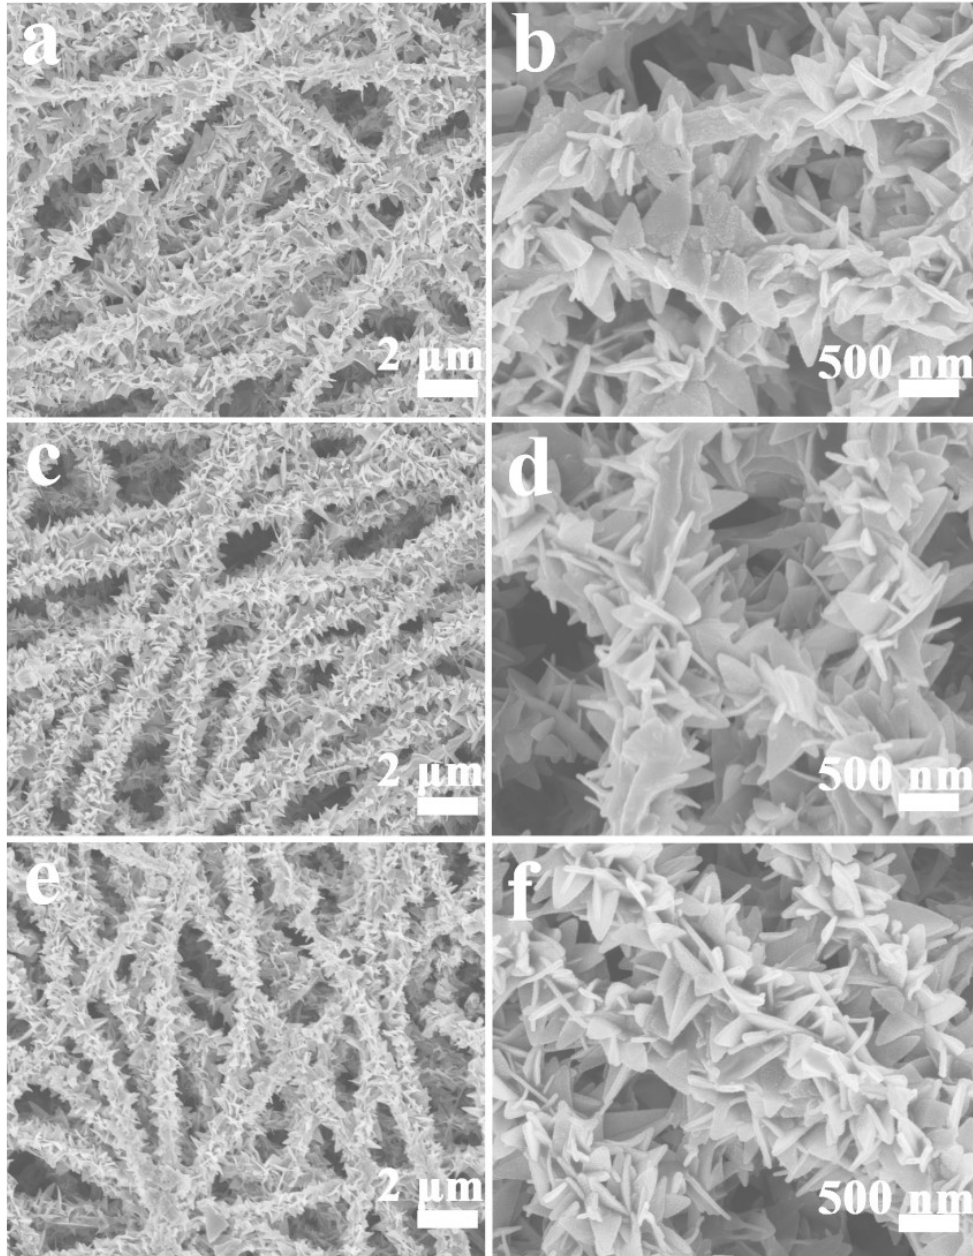

Fig. S10 SEM images of the CoSSe@C composites at different mass ratios between CNF@CoS<sub>2</sub>@C and Se powder : (a, b) 2:1; (c, d) 3:1; (e, f) 4:1.

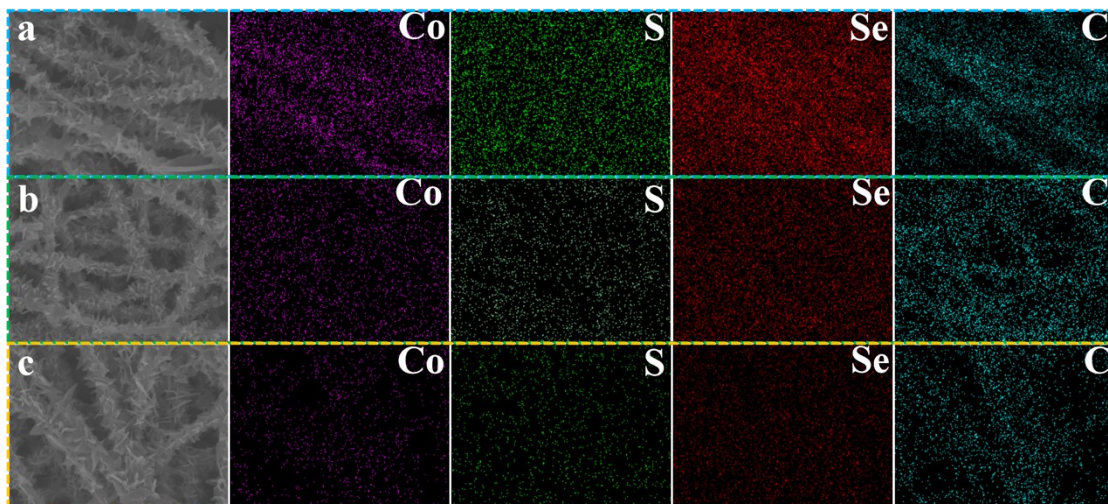

Fig. S11 EDX elemental mapping images of the CoSSe@C composites at different mass ratio between CNF@CoS<sub>2</sub>@C and Se powder: (a, b) 2:1; (c, b) 3:1; (e, f) 4:1.

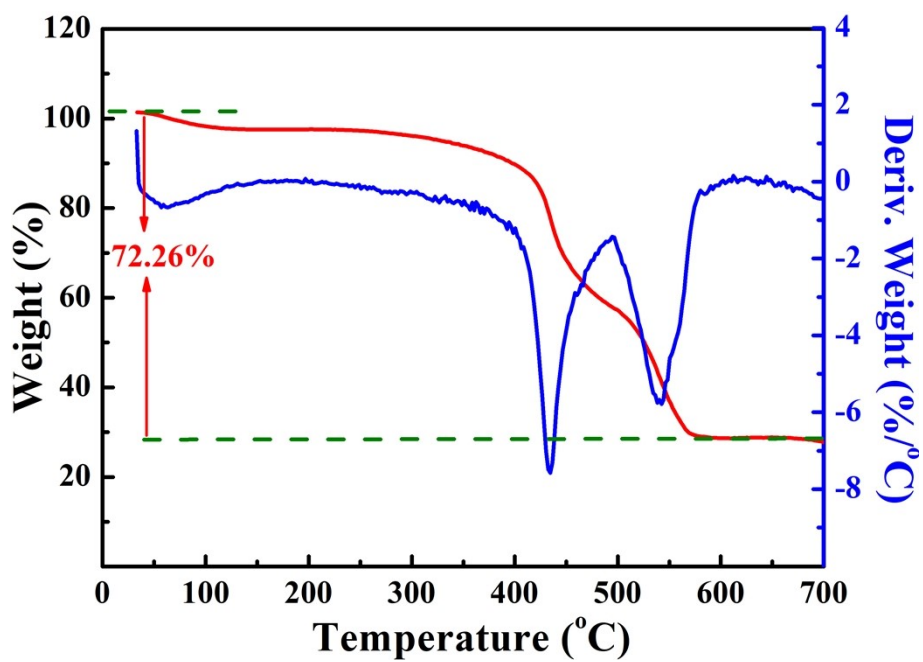

Fig. S12 TGA curves of the CNF@CoSSe@C composites.



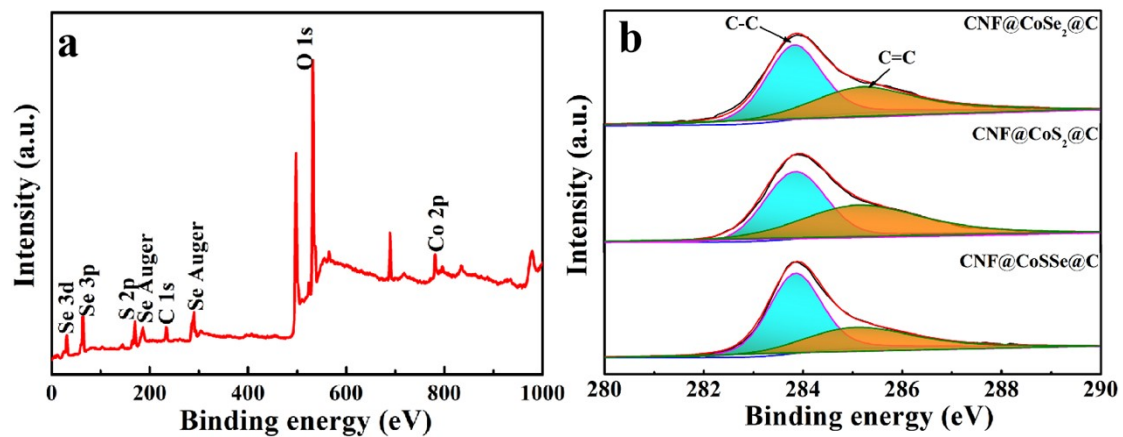

Fig. S13 (a) XPS survey spectra of the CNF@CoSSe@C composites, (b) high-resolution C 1s spectra of the CNF@CoSSe@C, CNF@CoS<sub>2</sub>@C, CNF@CoSe<sub>2</sub>@C composites.

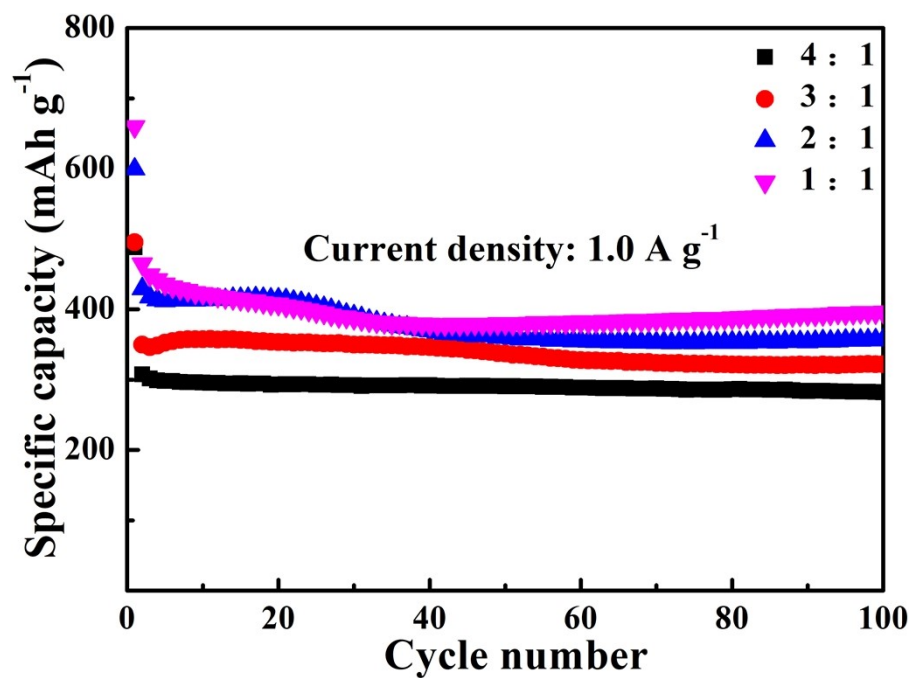

Fig. S14 Electrochemical performance of the CoSSe@C composites at different mass ratio between CNF@CoS<sub>2</sub>@C and Se powder.

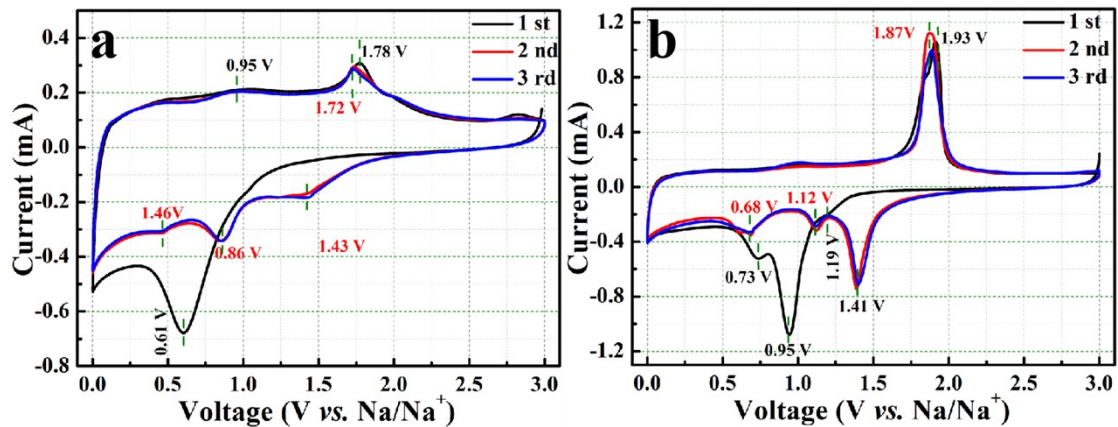

Fig. S15 CV profiles of the electrodes at 0.5 mV s<sup>-1</sup>: (a) CNF@CoS<sub>2</sub>@C, (b) CNF@CoSe<sub>2</sub>@C.

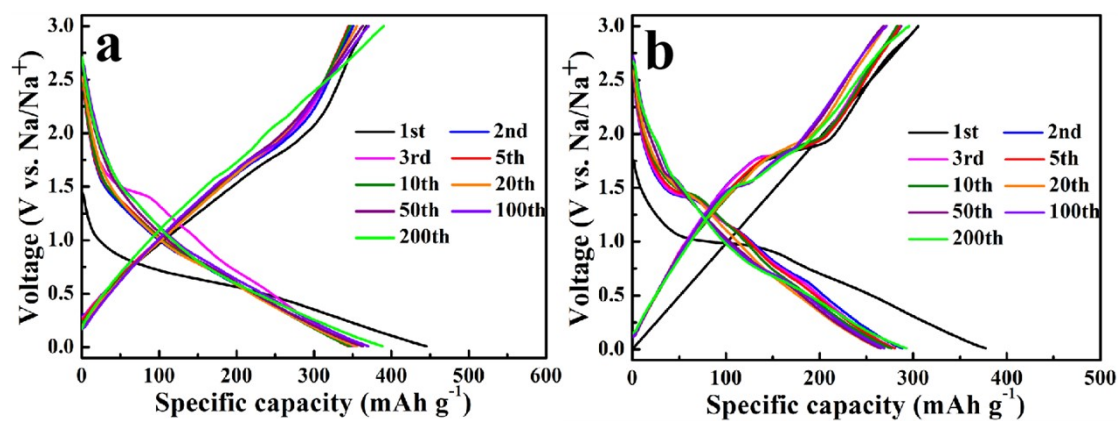

Fig. S16 GCD profiles of the electrodes at 1.0 A g<sup>-1</sup>: (a) CNF@CoS<sub>2</sub>@C, (b) CNF@CoSe<sub>2</sub>@C.

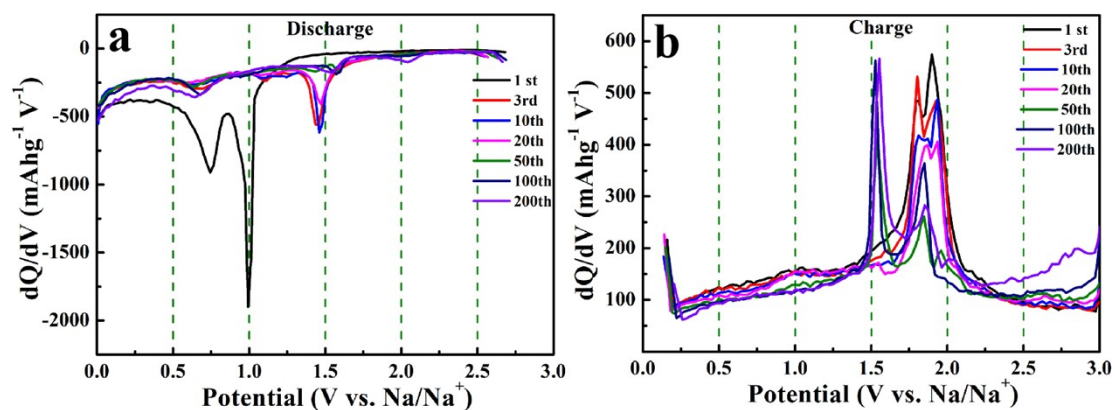

Fig. S17 The differential capacity curves of the CNF@CoSSe@C electrode at 1.0 A g<sup>-1</sup>.

Note: In Fig. S17a, two obvious cathodic peaks located at about 0.98 and 0.74 V agree with the CV results. As the cycle continues from 2 nd to 20 th cycle, a peak at about 1.47 V disappeared and meanwhile two new peaks at about 1.57 and 2.04 V were found. During the charging process from 1st to 20th cycle (Fig. S17b), the peaks at about 1.82 and 1.91 V are due to the stepwise desodiation process generating the single CoSSe or mixed CoS and CoSe structure. From 50th to 200 th cycle, an obvious anodic peak at 1.55 V appears. The appearance and transfer of these new redox peaks maybe raised by the continuous activation behaviors of the electrode material during the repeated Na<sup>+</sup> de-intercalation.

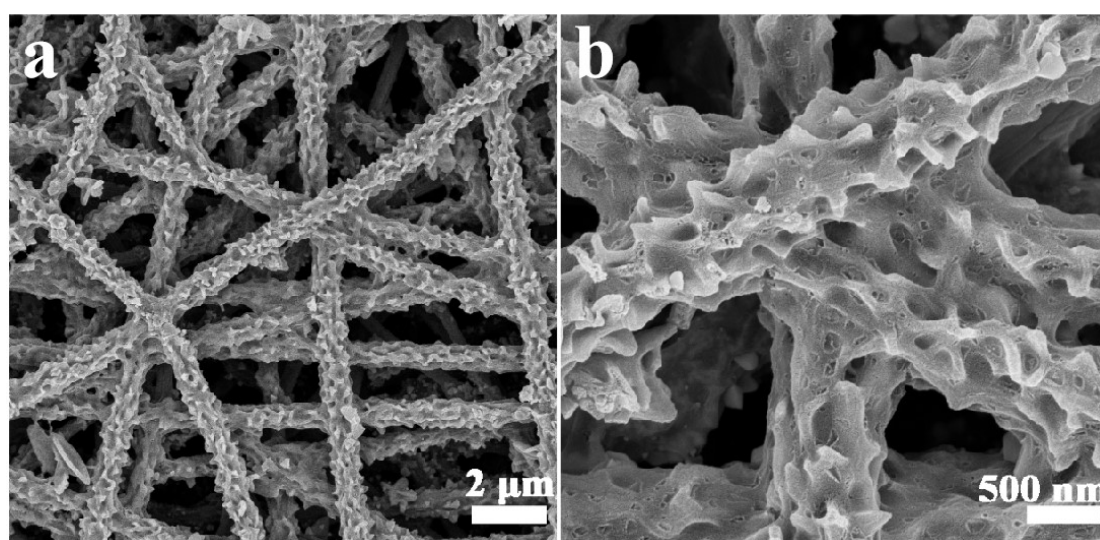

Fig. S18 SEM images for the CNF@CoSSe@C film as binder-free anode after cycling.

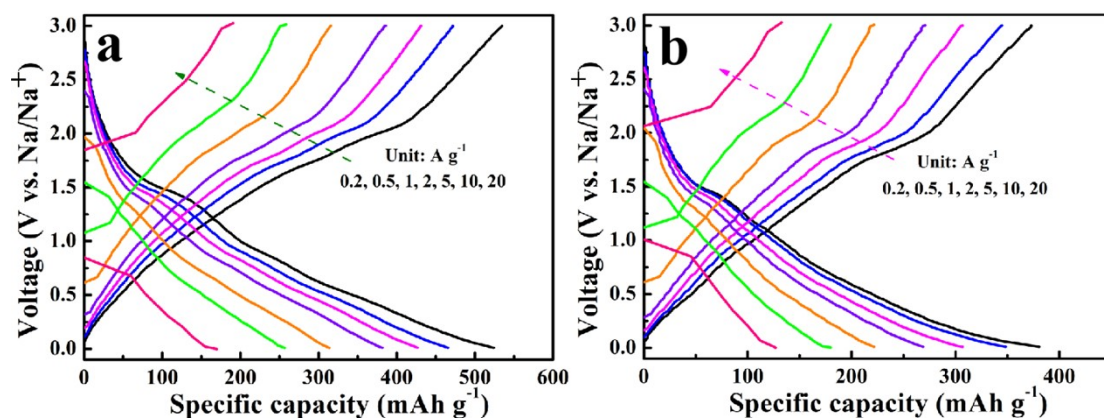

Fig. S19 GCD profiles of the electrodes at different rates: (a) CNF@CoS<sub>2</sub>@C, (b) CNF@CoSe<sub>2</sub>@C.

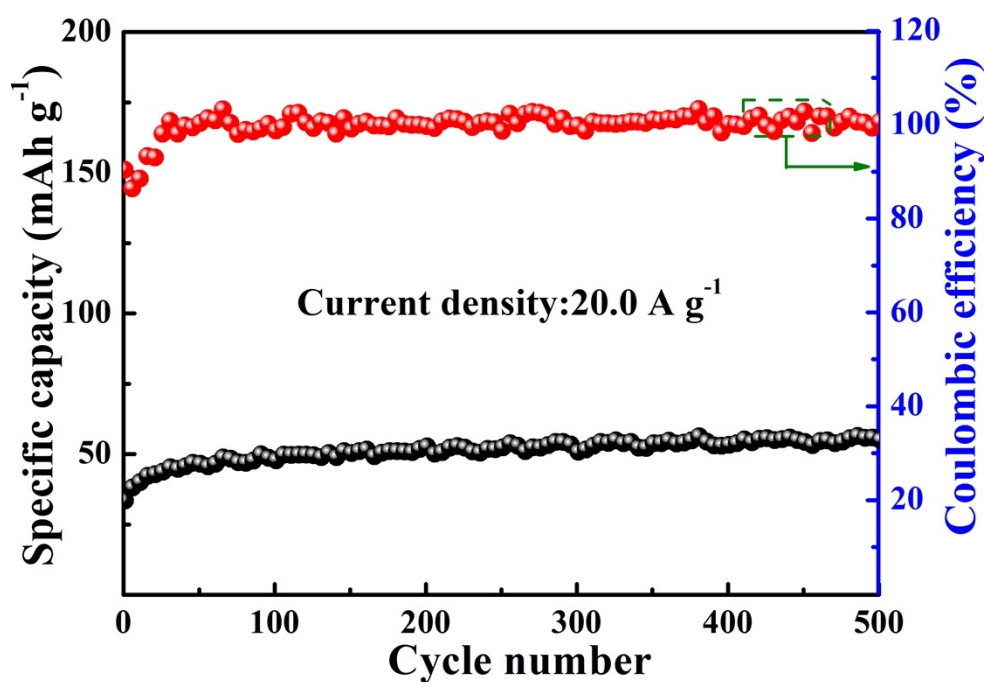

Fig. S20 The cycling performance of the pure carbon at 20.0 A g<sup>-1</sup> with a voltage window of 0.01-3.0V.

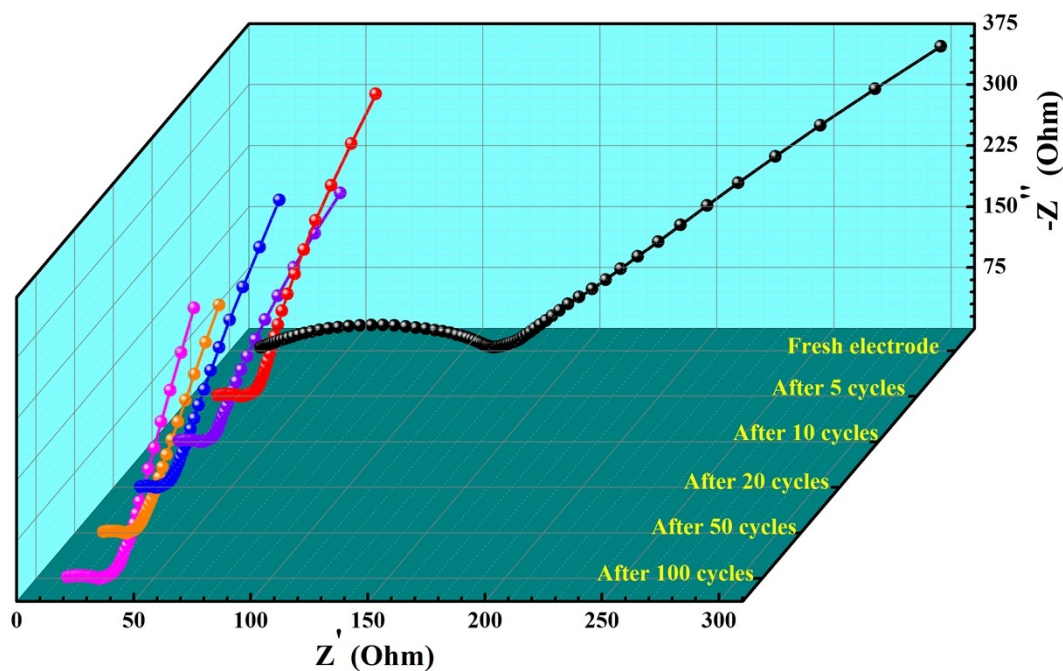

Fig. S21 In-situ Nyquist plots of the CNF@CoSSe@C composites at predetermined cycles.

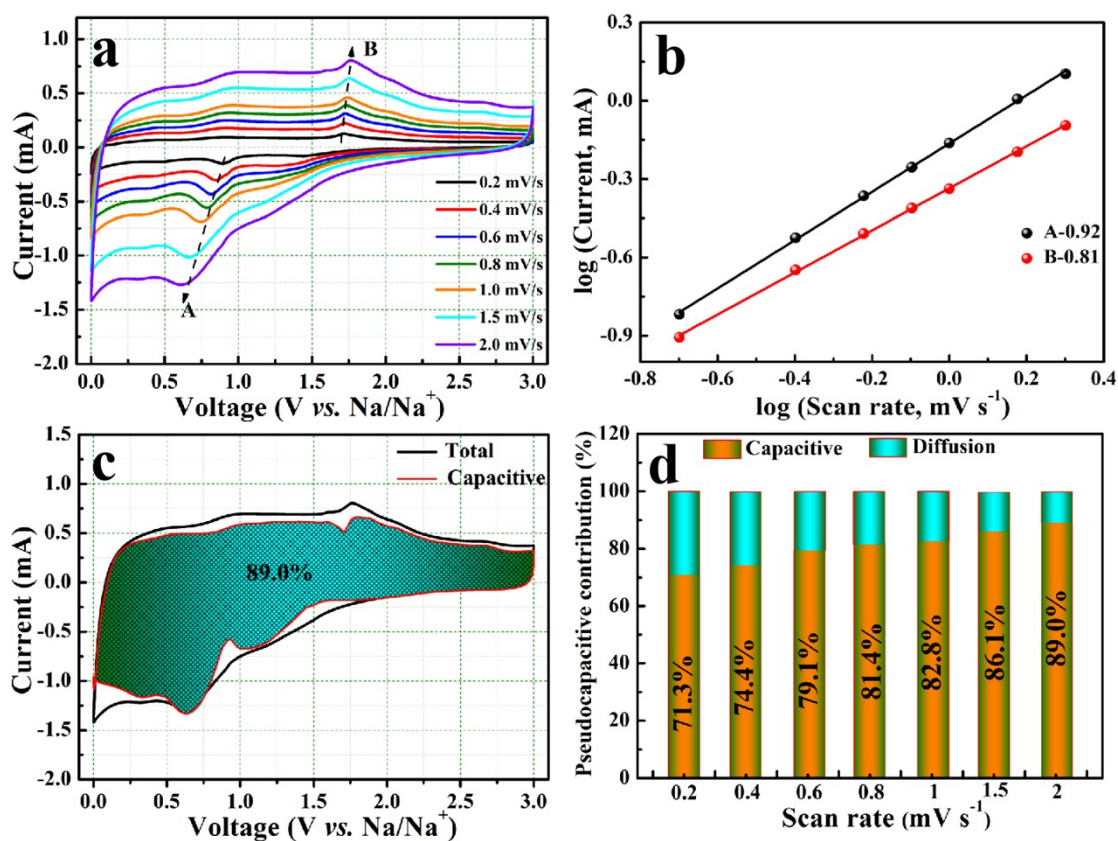

Fig. S22 Scan rate-dependent CV curves (a), the plots of  $\log i$  and  $\log v$  at each redox peak (b), capacitive charge contribution (dark green shadow) at  $2.0 \text{ mV s}^{-1}$  (c), and the normalized percentage of capacitive contributions at distinct scan rates (d) for the CNF@CoS<sub>2</sub>@C electrode.

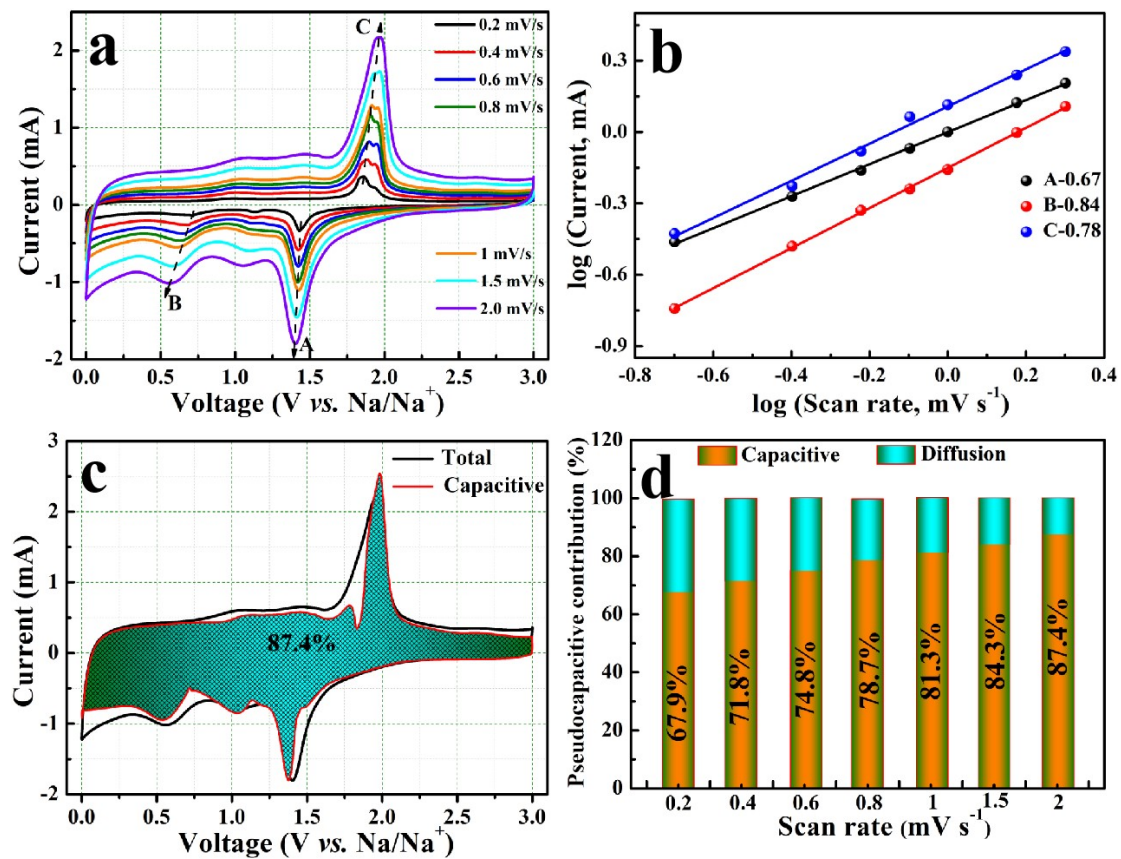

Fig. S23 Scan rate-dependent CV curves (a), the plots of  $\log i$  and  $\log v$  at each redox peak (b), capacitive charge contribution (dark green shadow) at 2.0 mV s<sup>-1</sup> (c), and the normalized percentage of capacitive contributions at distinct scan rates (d) for the CNF@CoSe<sub>2</sub>@C electrode.

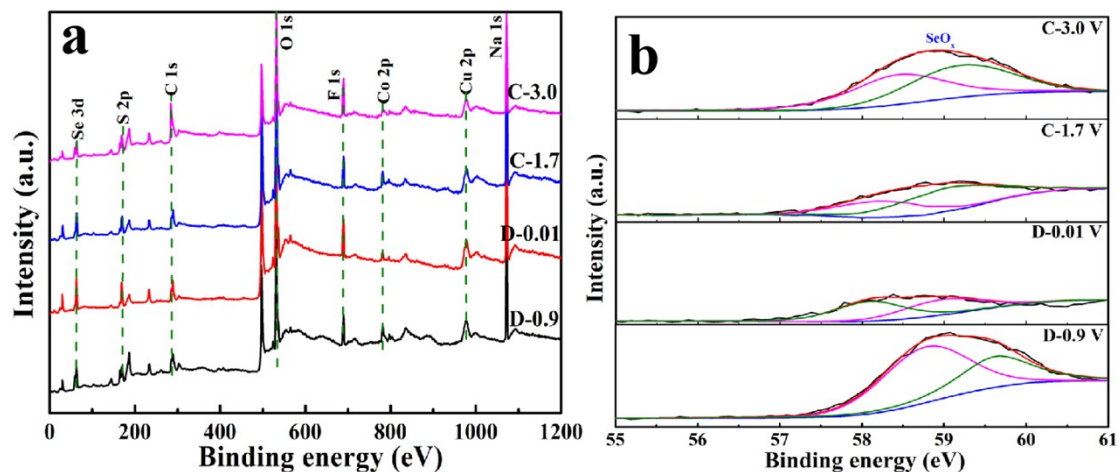

Fig. S24 Ex-situ XPS spectra of the CNF@CoSSe@C electrode at predetermined voltage states: (a) XPS Survey spectra; (b) High-resolution C 1s spectra.

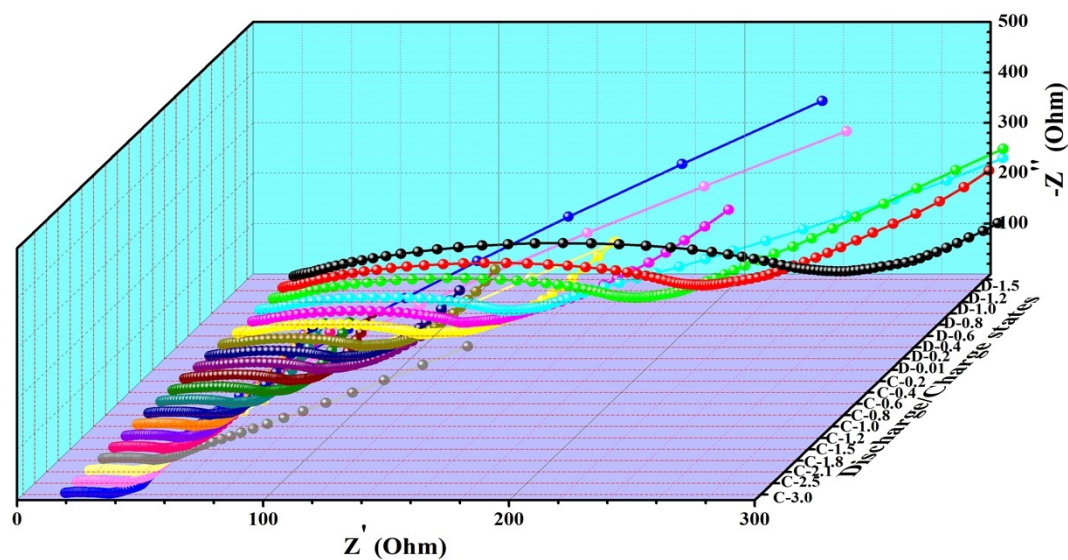

Fig. S25 In-situ Nyquist plots of the CNF@CoSSe@C composites with respect to predetermined potentials within the 1<sup>st</sup> cycle.

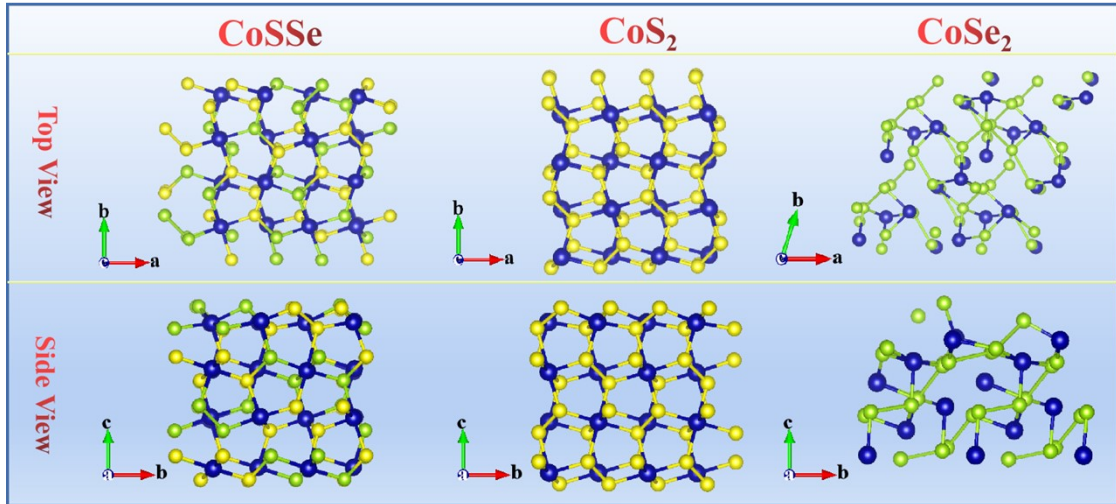

Fig. S26 The surface slab models of the CoSSe, CoS<sub>2</sub>, and CoSe<sub>2</sub>.

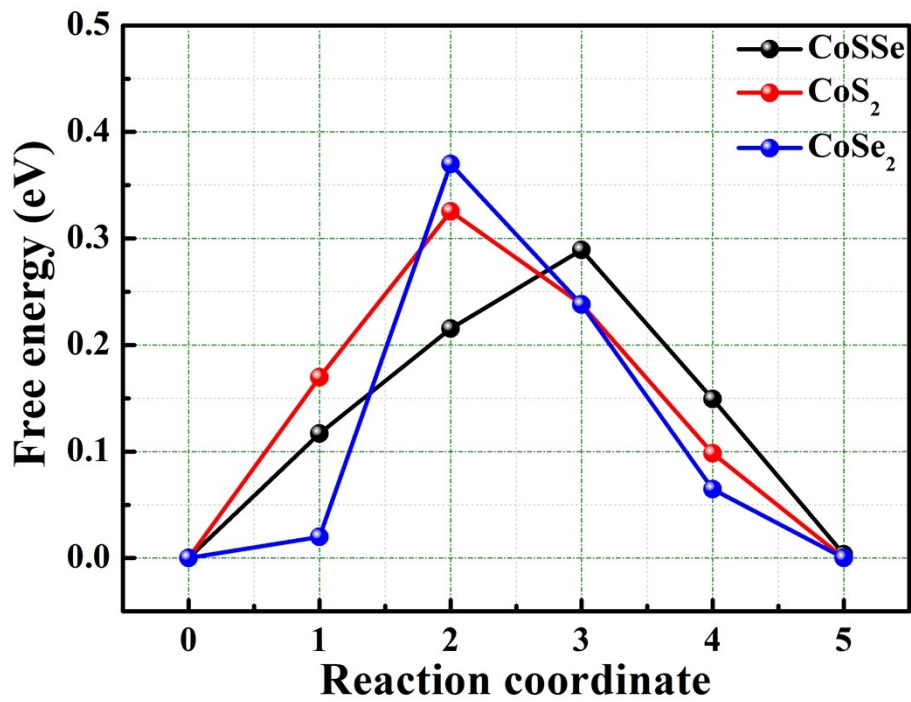

Fig. S27 The Na<sup>+</sup> migration energy barriers of the CoSSe, CoS<sub>2</sub> and CoSe<sub>2</sub> models.



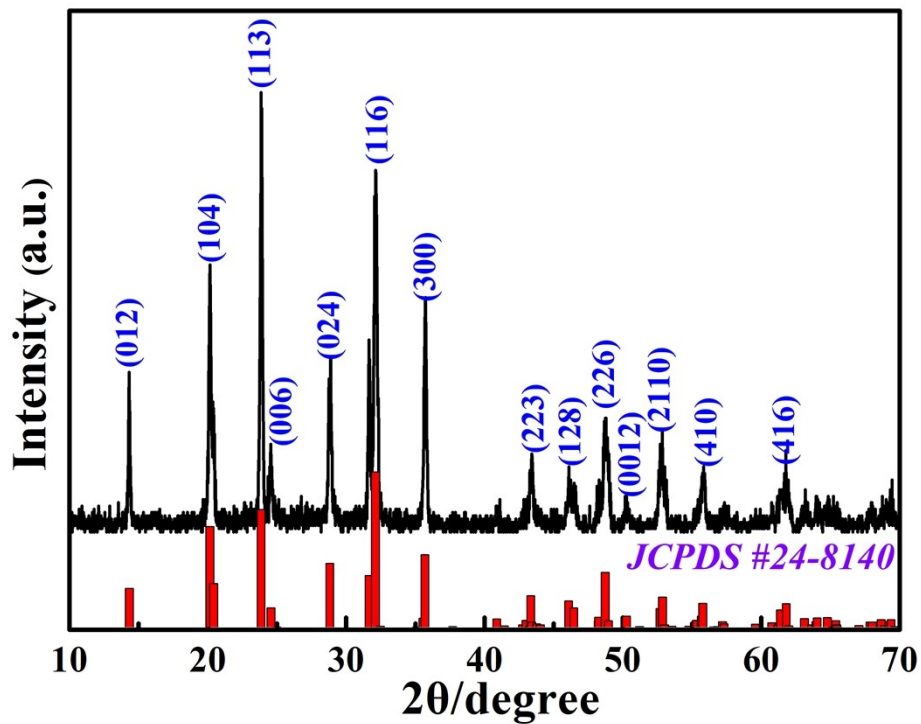

Fig. S28 XRD pattern of the NVP@C.

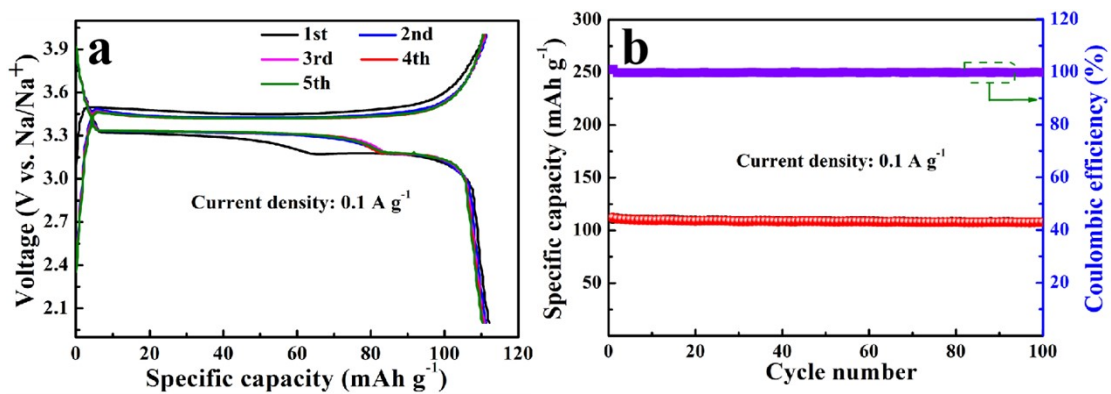

Fig. S29 GCD profiles (a) and cycling performance (b) of the NVP@C cathode at  $0.1 \text{ A g}^{-1}$ .

Table S1 Comparison of cycle lifespan and specific capacity of the CNF@CoSSe@C with previous reported CoS<sub>2</sub>- and CoSe<sub>2</sub>-based anodes in SIBs systems.

| Materials                                                | Voltage window (V) | Rate (A g <sup>-1</sup> ) | Cycle number | Capacity (mAh g <sup>-1</sup> ) | Ref.             |
|----------------------------------------------------------|--------------------|---------------------------|--------------|---------------------------------|------------------|
| Cu-CoSe <sub>2</sub> microboxes                          | 0.01-3.0           | 1.0                       | 500          | 374.0                           | 1                |
| CoSe <sub>2</sub> @NC@TiO <sub>2</sub>                   | 0.01-3.0           | 0.2                       | 200          | 374.0                           | 2                |
| CoSe <sub>2</sub> @CNF                                   | 0.01-3.0           | 2.0                       | 1000         | 370.0                           | 3                |
| CoSe <sub>2</sub> /WSe <sub>2</sub> @@C/CNs              | 0.01-3.0           | 0.5                       | 200          | 277.0                           | 4                |
| P-CoSe <sub>2</sub> /C                                   | 0.01-3.0           | 0.2                       | 200          | 322.0                           | 5                |
| Multishell CoSe <sub>2</sub>                             | 0.01-3.0           | 1.0                       | 2000         | 319.0                           | 6                |
| N-CNT/rGO/CoSe <sub>2</sub>                              | 0.3-2.9            | 10.0                      | 10000        | 264.0                           | 7                |
| Hollow microflower-like CoSe <sub>2</sub>                | 0.5-3.0            | 1.0                       | 1690         | 220.0                           | 8                |
| CoS <sub>2</sub> /Sb <sub>2</sub> S <sub>3</sub> @NC/CNT | 0.01-3.0           | 0.5                       | 200          | 360.1                           | 9                |
| rGO-CoS <sub>2</sub> -GNCSs                              | 0.4-2.9            | 1.0                       | 400          | 412.3                           | 10               |
| f-Ti <sub>3</sub> C <sub>2</sub> /CoS <sub>2</sub> @NPC  | 0.01-3.0           | 10.0                      | 8000         | 104.1                           | 11               |
| AGC-CoS <sub>2</sub> /NCNFs                              | 0.01-3.0           | 3.2                       | 1000         | 148.0                           | 12               |
| SnS <sub>2</sub> -CoS <sub>2</sub> @C                    | 0.2-3.0            | 5.0                       | 500          | 402.5                           | 13               |
| Cu-CoS <sub>2</sub> @CuxS                                | 0.4-2.6            | 0.3                       | 300          | 385.0                           | 14               |
| CoS <sub>2</sub> @MCNFs                                  | 0.4-2.9            | 1.0                       | 900          | 620.0                           | 15               |
| <b>CNF@CoSSe@C</b>                                       | <b>0.01-3.0</b>    | <b>20.0</b>               | <b>13000</b> | <b>158.2</b>                    | <b>This work</b> |

## References

- 1 Y. J. Fang, X. Y. Yu and X. W. Lou, *Adv. Mater.*, 2018, **21**, 1706668.
- 2 B. Zhao, Q. Q. Liu, G. J. Wei, J. H. Wang, X. Y. Yu, X. Li and H. B. Wu, *Chem. Eng. J.*, 2019, **378**, 122206.
- 3 H. Yin, H. Q. Qu, Z. T. Liu, R. Z. Jiang, C. Li and M. Q. Zhu, *Nano Energy*, 2019, **58**, 715–723.
- 4 S. Q. Zhang, L. L. Sun, L. Yu, G. H. Zhai, L. X. Li, X. J. Liu and H. Wang, *Small*, 2021, **49**, 2103005.
- 5 J. J. Ye, X. T. Li, G. Xia, G. H. Gong, Z. Q. Zheng, C. Z. Chen and C. Hu, *J. Mater. Sci. Technol.*, 2021, **77**, 100–107.
- 6 H. J. Liang, X. T. Li, X. L. Liu, R. Sun, Z. X. Qin, Y. F. Zhang and H. S. Fan, *J. Power Sources*, 2022, **517**, 230729.
- 7 M. S. Jo, J. S. Lee, S. Y. Jeong, J. K. Kim, Y. C. Kang, D. W. Kang, S. M. Jeong and J. S. Cho, *Small*, 2020, **38**, 2003391.
- 8 X. Q. Ma, L. Zou and W. X. Zhao, *Chem. Commun.*, 2018, **54**, 10507–10510.
- 9 X. T. Li, H. J. Liang, X. L. Liu, R. Sun, Z. X. Qin, H. S. Fan and Y. F. Zhang, *Chem. Eng. J.*, 2021, **425**, 130657.
- 10 X. He, L. N. Bi, Y. Li, C. G. Xu and D. M. Lin, *Electrochim. Acta*, 2020, **332**, 135453.
- 11 P. F. Huang, H. J. Ying, S. L. Zhang, Z. Zhang and W. Q. Han, *Chem. Eng. J.*, 2022, **429**, 132396.
- 12 W. M. Zhang, Z. W. Yue, Q. M. Wang, X. X. Zeng, C. C. Fu, Q. Li, X. T. Li, L. D. Fang and L. Li, *Chem. Eng. J.*, 2020, **380**, 122548.
- 13 X. Q. Liu, Y. Xiang, Q. P. Li, Q. J. Zheng, N. Jiang, Y. Huo and D. M. Lin, *Electrochim. Acta*, 2021, **387**, 138525.
- 14 Y. J. Fang, D. Y. Luan, Y. Chen, S. Y. Gao and X. W. Lou, *Angew. Chem. Int. Ed.*, 2020, **7**, 2644–2648.
- 15 Y. L. Pan, X. D. Cheng, L. L. Gong, L. Shi, T. Zhou, Y. R. Deng and H. P. Zhang, *ACS Appl. Mater. Interfaces*, 2018, **10**, 31441–31451.
